# Supplementary material for: A novel colorimetric and fluorescent probe based on a core-extended perylene tetra-(alkoxycarbonyl) derivative for the selective sensing of fluoride ions
Source: Royal Society of Chemistry journal article supplement (doi:10.1039/d1ra07596a), 2021-12-22

## **Supporting Information**

### **A novel colorimetric and fluorescent probe based on core-extended perylene tetra-(alkoxycarbonyl) derivative for selective sensing of fluoride ions**

Yongshan Ma <sup>\*</sup>, Yanzhao Xia, Yanyan Zhu, Fengxia Zhang <sup>\*</sup>, Jingcheng Cui, Tianyi Jiang, Xiangfeng Jia, Xuemei Li

*School of Municipal and Environmental Engineering, Shandong Jianzhu University, Jinan 250101, Shandong, China.*

<sup>\*</sup> Corresponding author. E-mail addresses: [mlosh@sdjzu.edu.cn](mailto:mlosh@sdjzu.edu.cn) (Y. Ma), [zhangfengxia19@sdjzu.edu.cn](mailto:zhangfengxia19@sdjzu.edu.cn) (F. Zhang).

## Experimental section

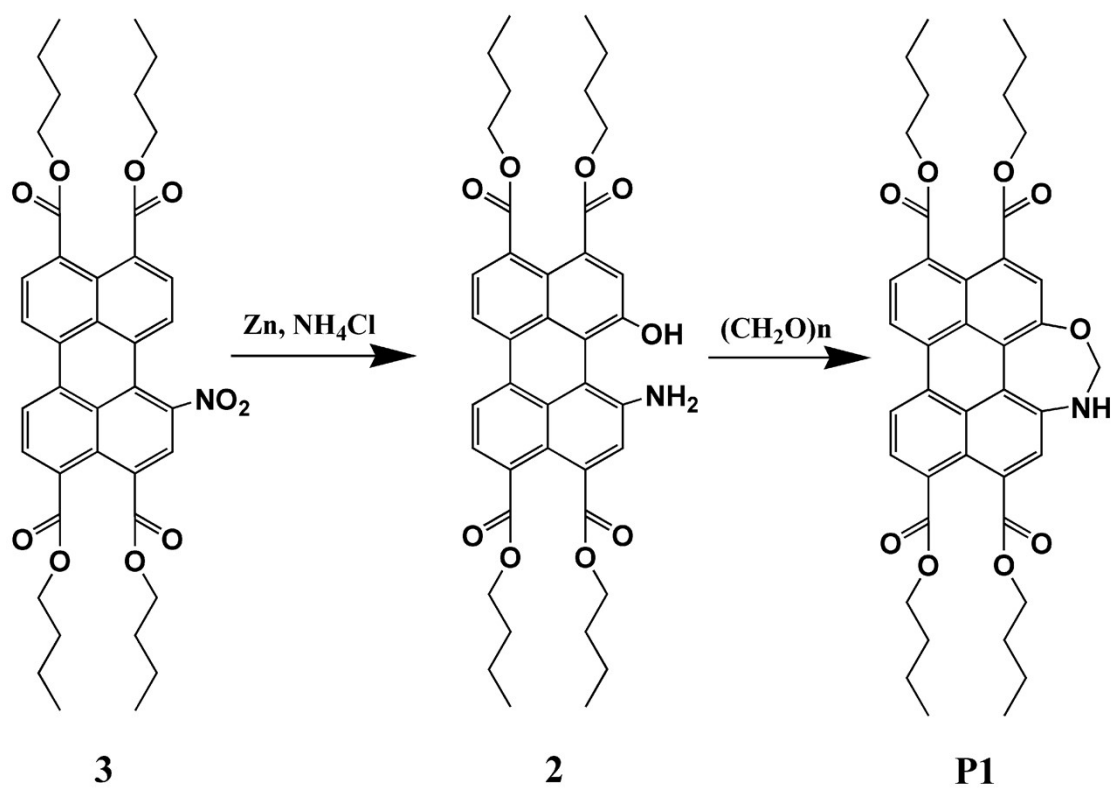

Scheme s-1. The synthesis route of P1

Fig. S-1  $^1\text{H}$  NMR Spectra of P1

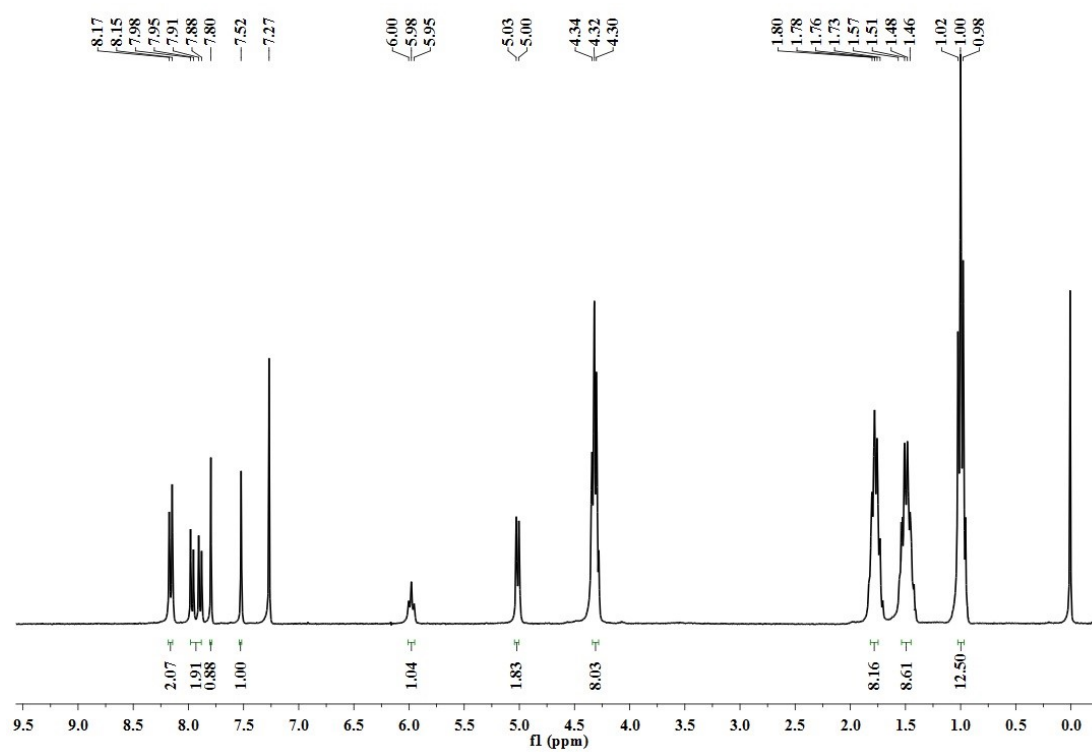

Fig. S-2  $^{13}\text{C}$  NMR Spectra of P1

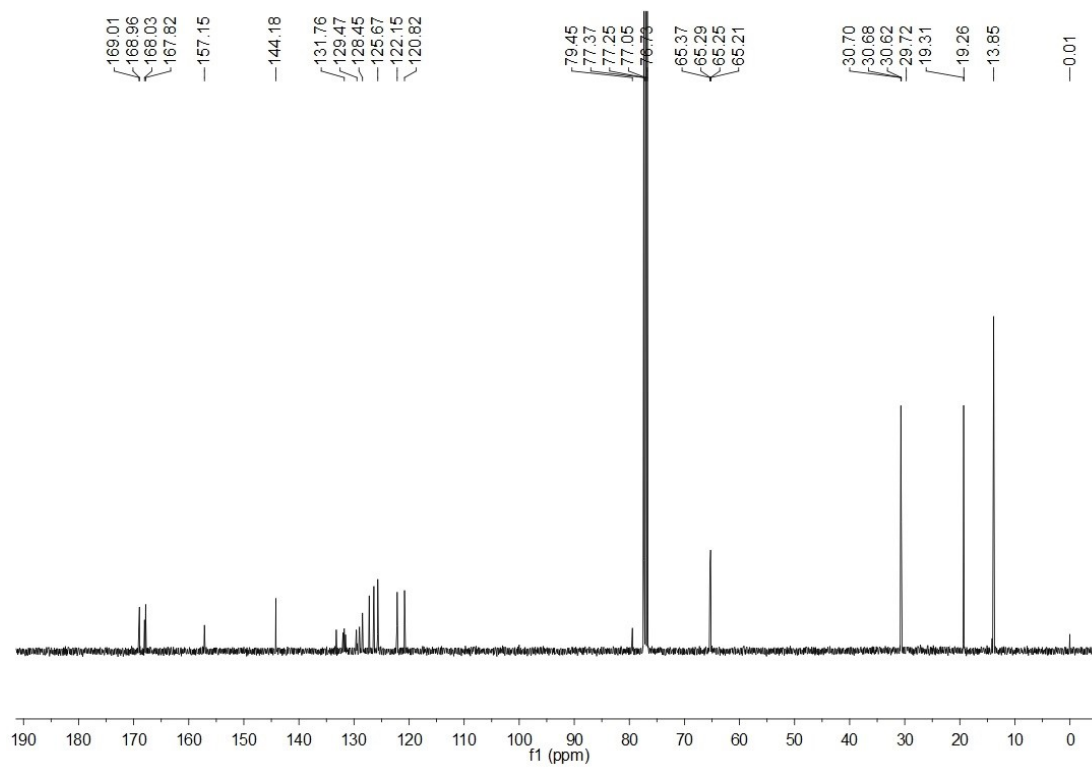

Fig. S-3 FTIR Spectra of P1

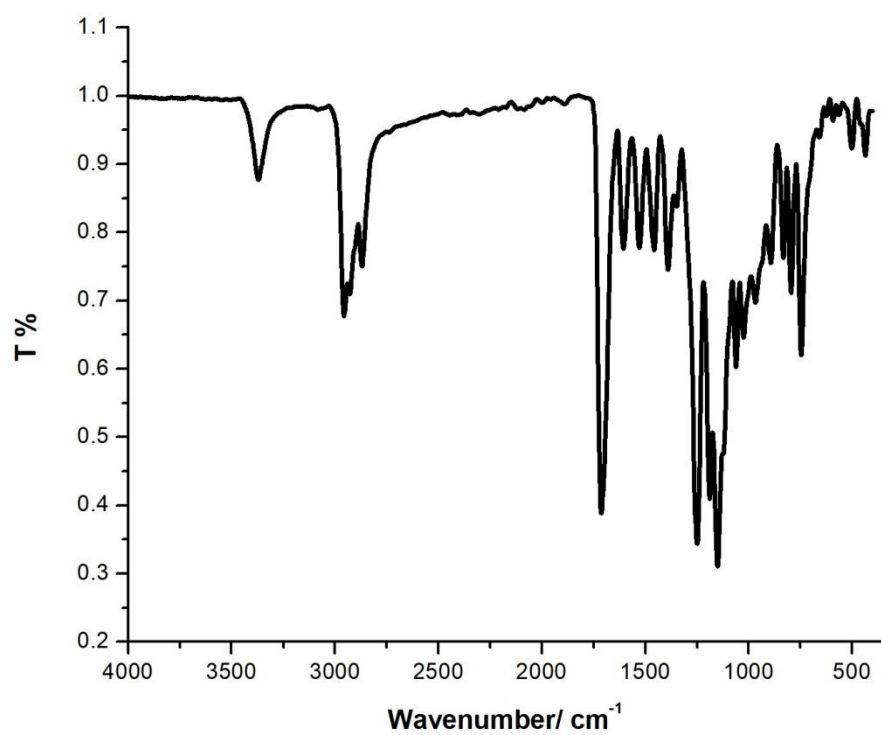

Fig. S-4 MALDI-TOF-MS Spectra of P1

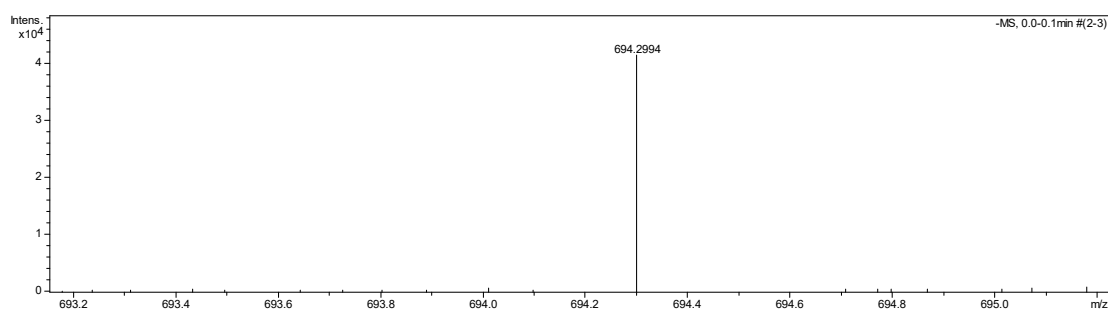

Fig. S-5 Job's plot of P1 with  $F^-$  ions.

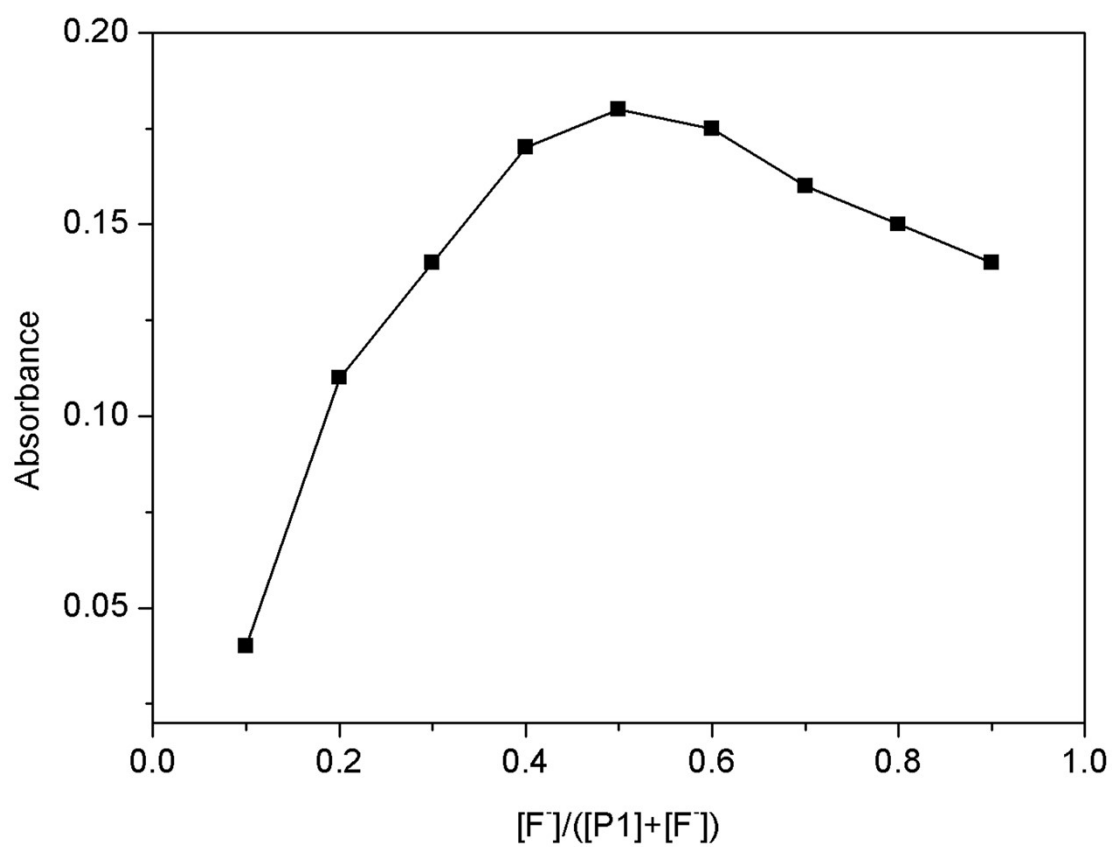

Fig. S-6 Benesi-Hildebrand plot of P1 with  $F^-$  ions.

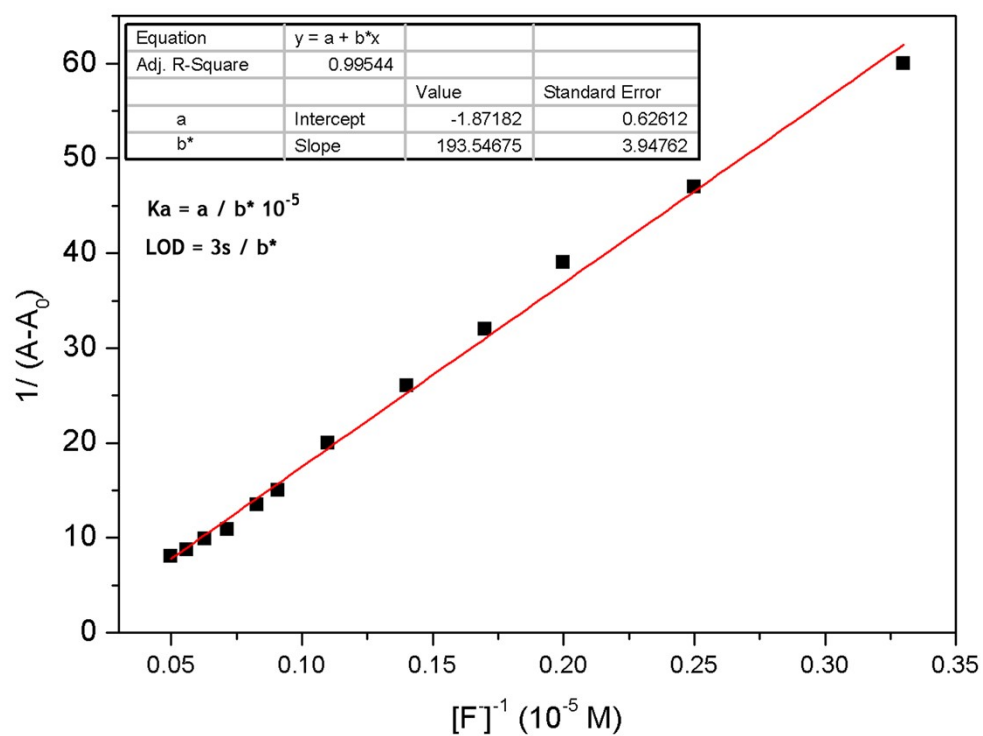

Fig. S-7 Linear correlation plot of the emission intensity of P1 at 574 nm with F<sup>-</sup> ions (3-20 equiv.) in DCM.

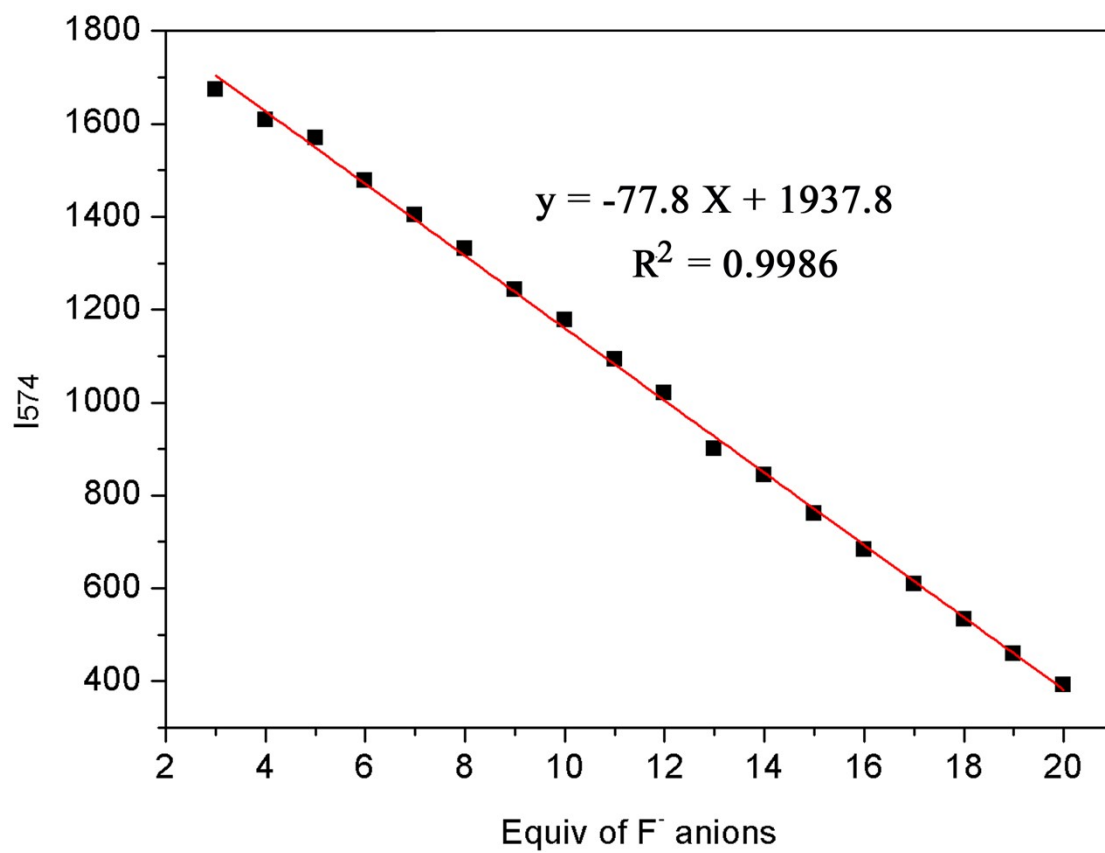

Supplement: d1ra07596a1.pdf [file d1ra07596a1.pdf]
